# Supplementary material
Source: PubMed Central journal article supplement (PMC1586040)
Supplement: plntphys_pp.106.080895_2.pdf [file plntphys_pp.106.080895_2.pdf]

| <b>Medium</b>     | <b><i>tnp</i> penetrance (%)</b> |
|-------------------|----------------------------------|
| ½MS               | 0 (n = 148)                      |
| ½MS10             | 8.7 (n = 127)                    |
| ½MS + 1% mannitol | 0 (n = 283)                      |

Table S1
